# Supplementary material for: Nanostructured Molybdenum Oxides from Aluminium-Based Intermetallic Compound: Synthesis and Application in Hydrogen Evolution Reaction
Source: MDPI journal article supplement (doi:10.3390/nano11051313), 2021-05-17
Supplement: s1 [file s1]

Supplementary Information:

# Nanostructured Molybdenum Oxides from Aluminium-Based Intermetallic Compound: Synthesis and Application in Hydrogen Evolution Reaction

Deepti Raj <sup>1</sup>, Federico Scaglione <sup>1,\*</sup>, Gianluca Fiore <sup>1</sup>, Federica Celegato <sup>2</sup> and Paola Rizzi <sup>1</sup>

<sup>1</sup> Dipartimento di Chimica and Centro Interdipartimentale NIS (Nanostructured Interfaces and Surfaces), Università di Torino, V. Giuria 7, 10125 Turin, Italy; deepti.raj@unito.it (D.R.); federico.scaglione@unito.it (F.S.); gianluca.fiore@unito.it (G.F.); paola.rizzi@unito.it (P.R.)

<sup>2</sup> Istituto Nazionale di Ricerca Metrologica (INRIM), Str. Delle Cacce 91, 10135 Turin, Italy; f.celegato@inrim.it

\* Correspondence: federico.scaglione@unito.it

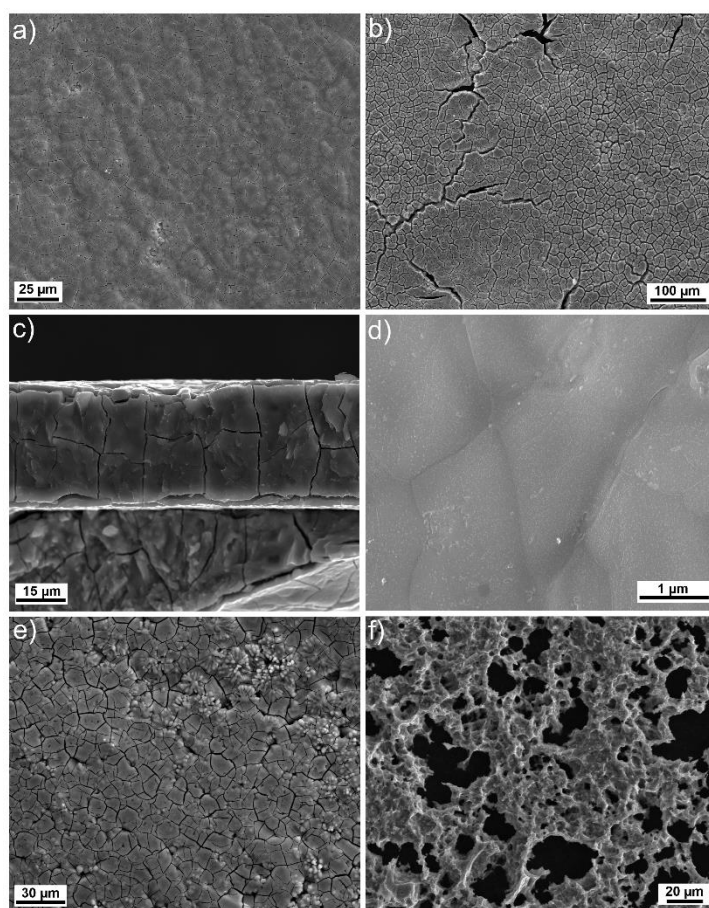

**Figure S1.** SEM images of sample obtained by **a)** free corrosion in 1 M KOH for 6 h at 70 °C; **b)** electrochemical corrosion at 0.8 V in 1 M KOH for 2 h at room temperature; **c)** electrochemical corrosion at -0.4 V in 1 M HF for 1 h at 70 °C; **d)** electrochemical corrosion at 0.15 V in 1 M H<sub>2</sub>SO<sub>4</sub> for 1 h at 70 °C; **e)** free corrosion in 1 M Na<sub>2</sub>S for 6 h at 70 °C; and **f)** free corrosion in piranha solution (3:1) for 18 h at room temperature.

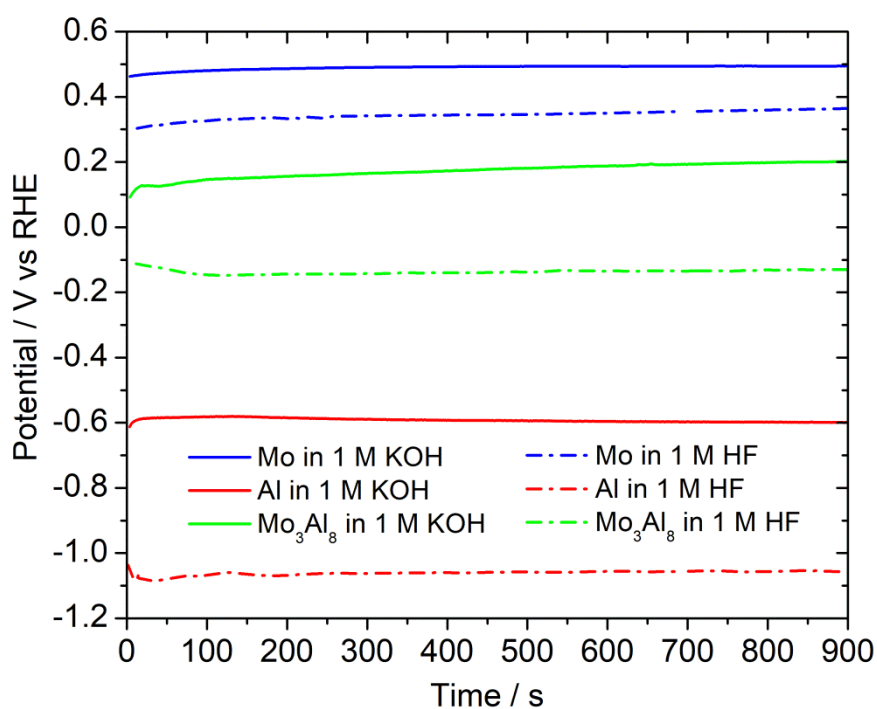

**Figure S2.** Evolution of the open-circuit potential (vs RHE) of pure Al and Mo, as references, and the as-quenched Mo<sub>3</sub>Al<sub>8</sub> ribbon vs RHE for 15 h

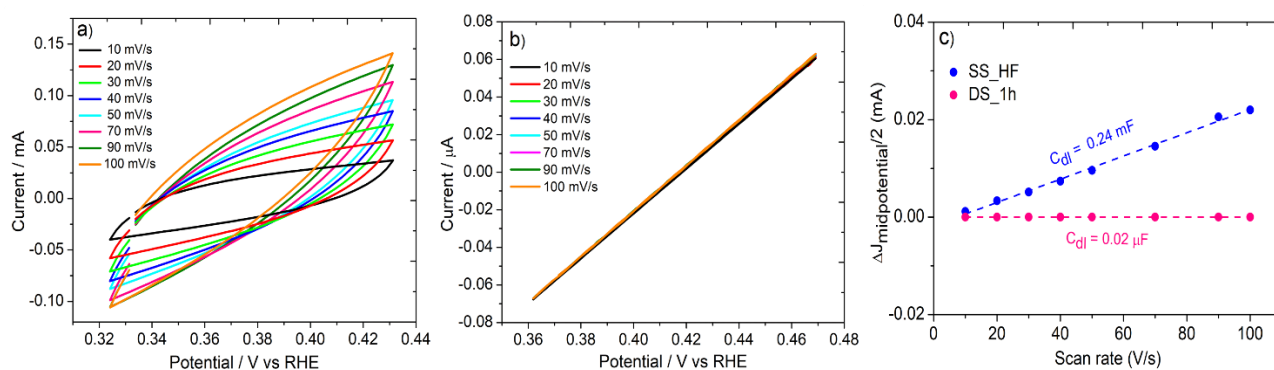

**Figure S3.** ECSA analysis of SS\_HF and DS\_1h: CV curves for **a)** SS\_HF, **b)** DS\_1h and **c)** corresponding dependence of  $\Delta J_{\text{midpotential}}/2$  and scan rate for SS\_HF and DS\_1h

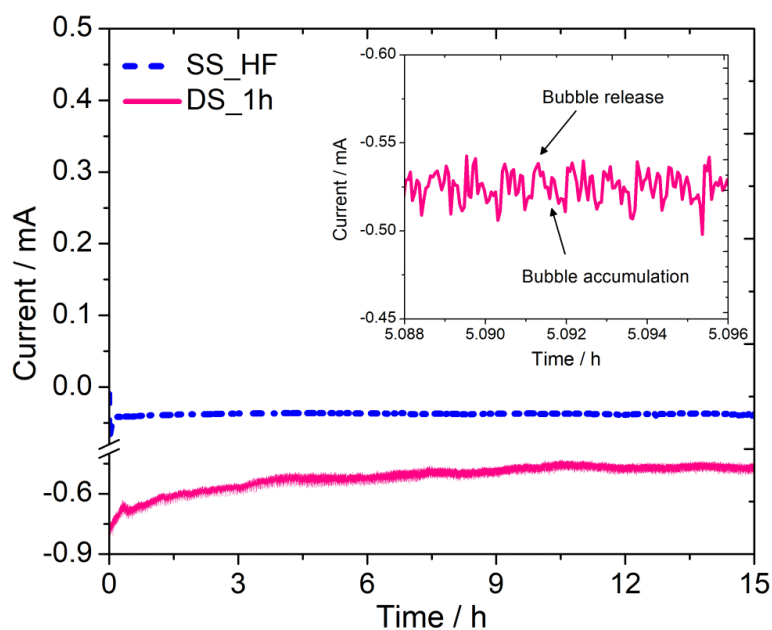

**Figure S4.** Chronoamperometric measurements for SS\_HF and DS\_1h in 0.5 M H<sub>2</sub>SO<sub>4</sub> at -0.48 V vs RHE

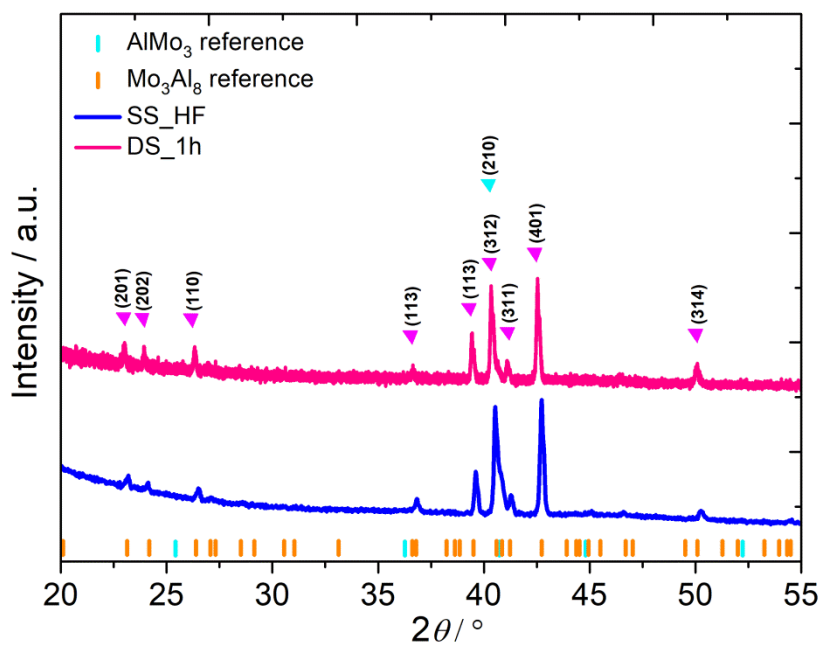

**Figure S5.** XRD patterns of SS\_HF and DS\_1h after the chronoamperometric stability test in 0.5 M H<sub>2</sub>SO<sub>4</sub> at -0.48 V vs RHE for 15 h

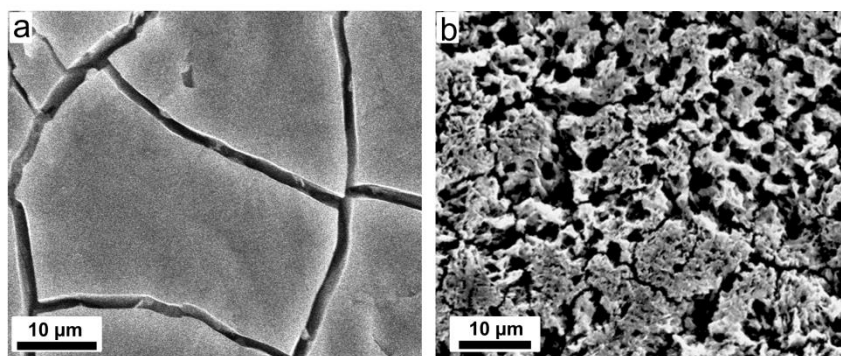

**Figure S6.** SEM images of SS\_HF and DS\_1h after the chronoamperometric stability test in 0.5 M  $\text{H}_2\text{SO}_4$  at  $-0.48\text{ V}$  vs RHE for 15 h
